# Supplementary material for: 3D hierarchical anatase TiO2 superstructures constructed by “nanobricks” built nanosheets with exposed {001} facets: facile synthesis, formation mechanism and superior photocatalytic activity
Source: Royal Society of Chemistry journal article supplement (doi:10.1039/c4ce01295j), 2014-01-01
Supplement: c4ce01295j1.pdf [file c4ce01295j1.pdf]

**Electronic Supplementary Information for:**

**3D Hierarchical anatase TiO<sub>2</sub> superstructures constructed  
by “nanobricks” built nanosheets with exposed {001} facets:  
facile synthesis, formation mechanism and superior  
photocatalytic activity**

**Guoliang Li,<sup>a</sup> Jiyan Liu,<sup>b</sup> Jing Lan,<sup>c</sup> Gang Li,<sup>b</sup> Qiuwen Chen<sup>\*a</sup> and Guibin Jiang<sup>b</sup>**

<sup>a</sup> State Key Laboratory of Environmental Aquatic Chemistry, Research Center for Eco-Environmental Sciences, Chinese Academy of Sciences, P.O. Box 2871, Beijing 100085, P. R. China; E-mail: [qchen@rcees.ac.cn](mailto:qchen@rcees.ac.cn); Tel: 8610-62849311.

<sup>b</sup> State Key Laboratory of Environmental Chemistry and Ecotoxicology, Research Center for Eco-Environment Sciences, Chinese Academy of Sciences, Beijing 100085, P. R. China.

<sup>c</sup> College of Chemistry and Pharmaceutical Sciences, Qingdao Agricultural University, Qingdao 266109, P. R. China.

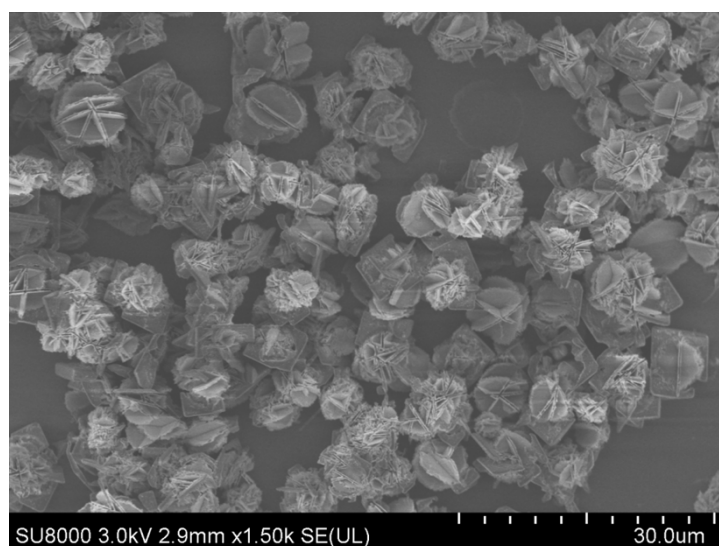

Fig. S1 SEM image of the 3DHTS.

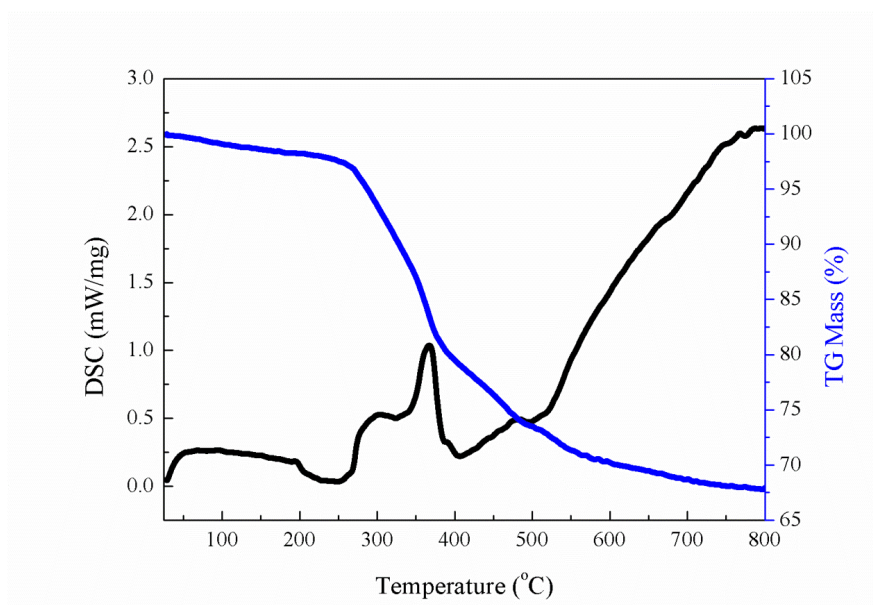

Fig. S2 TG-DSC curves of the  $\text{NH}_4\text{TiOF}_3$  sample treated from room temperature to 800 °C at 10 °C/min.

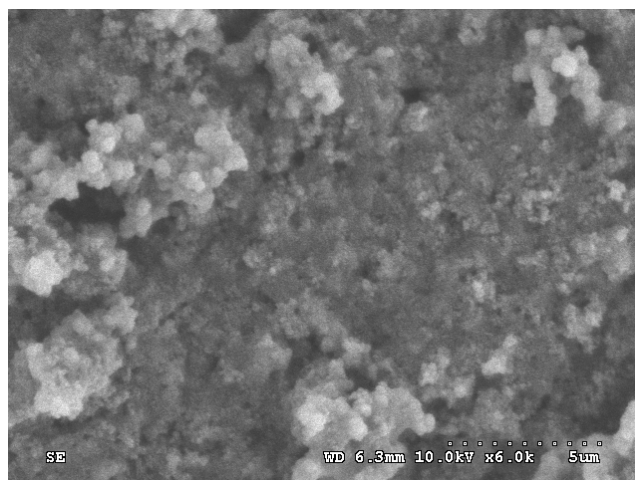

Fig. S3 SEM image of the sample obtained with increased dose (20 ml) of water.

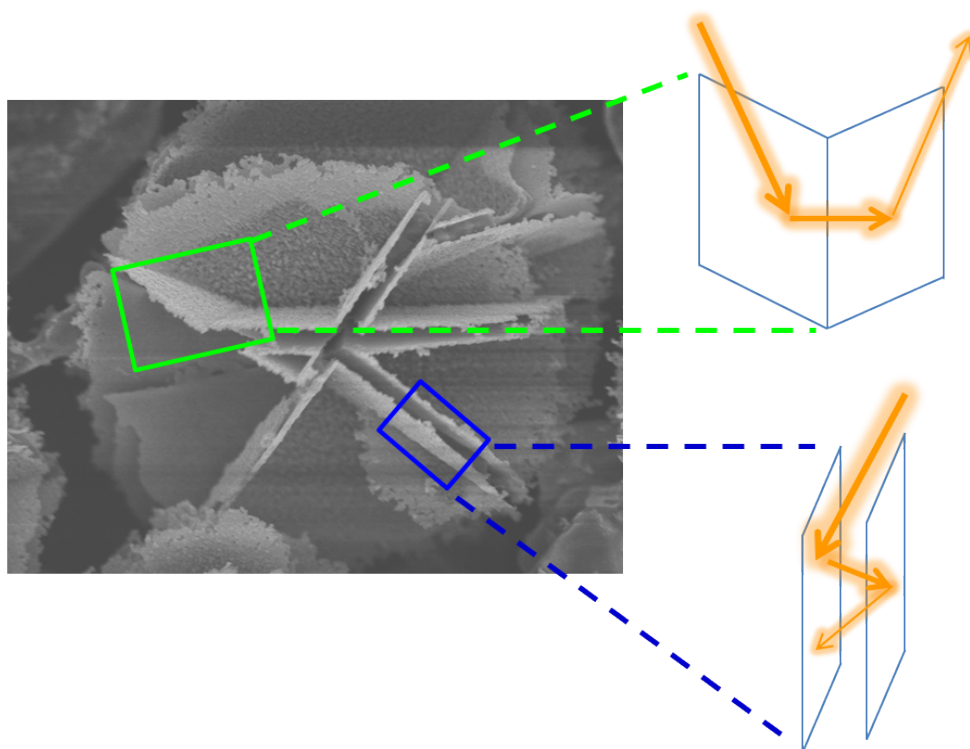

Fig. S4 Schematic illustration of light reflection in the 3DHTS.

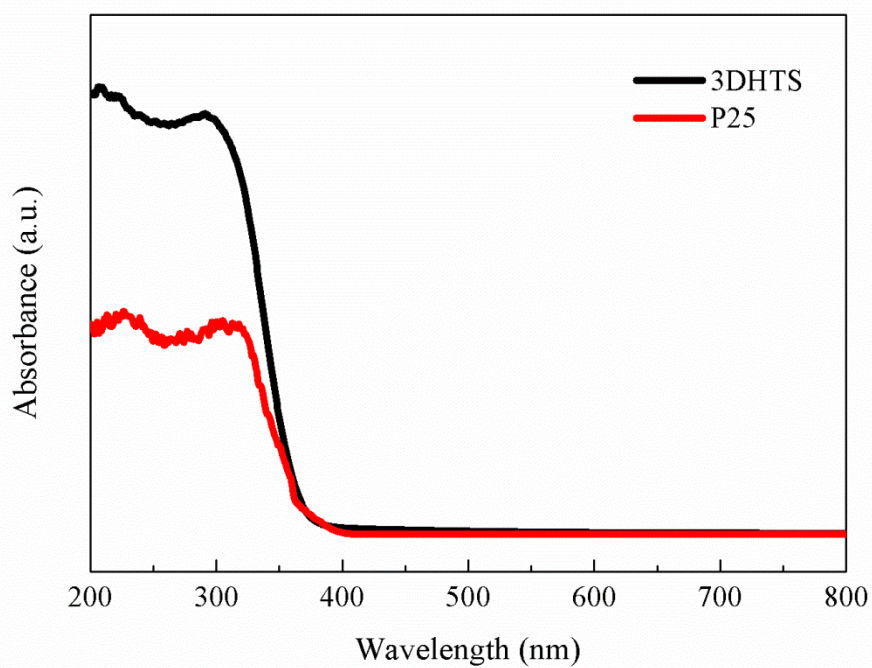

Fig. S5 UV-Vis diffuse reflectance spectra curves of the 3DHTS and the Degussa P25.
